# Supplementary material for: Cost-effectiveness of offering an area-level financial incentive on breast feeding: a within-cluster randomised controlled trial analysis
Source: PubMed Central journal article supplement (PMC7025724; doi:10.1136/archdischild-2018-316741), 2019-08-23
Supplement: archdischild-2018-316741supp001.pdf [file archdischild-2018-316741supp001.pdf]

**Supplementary 1a: Average cost per baby by intervention ward**

| <b>Wards</b>                | <b>Total average cost per baby per ward</b> | <b>No. of births</b> | <b>Total cost for ward</b> |
|-----------------------------|---------------------------------------------|----------------------|----------------------------|
| <b>Derbyshire</b>           |                                             |                      |                            |
| Barrow Hill New Whittington | 94.3                                        | 74                   | 6976                       |
| Bolsover North West         | 101.1                                       | 58                   | 5862                       |
| Clay Cross South            | 93.0                                        | 52                   | 4837                       |
| Clowne South                | 117.7                                       | 30                   | 3532                       |
| Hollingwood and Inkersall   | 81.3                                        | 80                   | 6500                       |
| Killamarsh West             | 111.4                                       | 48                   | 5347                       |
| Loundsley Green             | 71.6                                        | 37                   | 2649                       |
| Lowgates and Woodthorpe     | 59.9                                        | 50                   | 2994                       |
| Matlock St Giles            | 111.1                                       | 56                   | 6224                       |
| Moor                        | 75.8                                        | 42                   | 3185                       |
| North Wingfield Central     | 74.1                                        | 69                   | 5115                       |
| Old Whittington             | 119.7                                       | 39                   | 4669                       |
| Pinxton                     | 70.1                                        | 36                   | 2525                       |
| Pleasley                    | 168.9                                       | 18                   | 3040                       |
| Scarcliffe                  | 110.1                                       | 53                   | 5836                       |
| Shirebrook Langwith         | 109.7                                       | 23                   | 2523                       |
| South Normaton East         | 75.9                                        | 57                   | 4326                       |
| <b>Sheffield</b>            |                                             |                      |                            |
| Firth Park                  | 91.1                                        | 343                  | 31255                      |
| Mosborough                  | 115.3                                       | 151                  | 17404                      |
| Richmond                    | 85.6                                        | 176                  | 15068                      |
| Southey                     | 88.5                                        | 274                  | 24253                      |
| Woodhouse                   | 94.2                                        | 163                  | 15347                      |
| <b>Rotherham</b>            |                                             |                      |                            |
| Anston & Woodsetts          | 85.5                                        | 74                   | 6330                       |
| Boston Castle               | 103.5                                       | 190                  | 19666                      |
| Holderness                  | 84.2                                        | 128                  | 10780                      |
| Hoover                      | 92.2                                        | 150                  | 13837                      |
| Rother Vale                 | 100.9                                       | 131                  | 13216                      |
| Rotherham East              | 79.4                                        | 233                  | 18493                      |
| Silverwood                  | 70.1                                        | 146                  | 10239                      |
| Sitwell                     | 118.7                                       | 104                  | 12341                      |
| Wath                        | 78.7                                        | 142                  | 11180                      |
| Wingfield                   | 62.0                                        | 109                  | 6756                       |
| <b>Doncaster</b>            |                                             |                      |                            |

| <b>Wards</b>       | <b>Total average cost per baby per ward</b> | <b>No. of births</b>  | <b>Total cost for ward</b> |
|--------------------|---------------------------------------------|-----------------------|----------------------------|
| Armthorpe          | 85.5                                        | 180                   | 15385                      |
| Askern Spa         | 80.5                                        | 119                   | 9574                       |
| Bentley            | 74.7                                        | 216                   | 16128                      |
| Central            | 61.5                                        | 316                   | 19435                      |
| Great North Road   | 68.7                                        | 183                   | 12579                      |
| Mexborough         | 59.7                                        | 238                   | 14200                      |
| Sprotbrough        | 111.7                                       | 101                   | 11280                      |
| Thorne             | 75.5                                        | 132                   | 9964                       |
| Town Moor          | 68.2                                        | 173                   | 11793                      |
| <b>Bassetlaw</b>   |                                             |                       |                            |
| East Retford East  | 124.6                                       | 77                    | 9590                       |
| East Retford South | 97.9                                        | 61                    | 5973                       |
| Tuxford and Trent  | 136.8                                       | 43                    | 5882                       |
| Worksop North      | 87.1                                        | 109                   | 9498                       |
| Worksop North West | 78.7                                        | 114                   | 8977                       |
| <b>Mean (SD)</b>   | <b>91.45(22.38)</b>                         | <b>117.35 (78.49)</b> | <b>9989 (5538)</b>         |

**Supplementary 1b: Average cost per baby by intervention ward by activities**

| <b>Wards</b>                | <b>Voucher</b> | <b>Info packs</b> | <b>Initial local engagement</b> | <b>Induction</b> | <b>Processing time for claims</b> | <b>Processing time for successful applications</b> | <b>Letters</b> |
|-----------------------------|----------------|-------------------|---------------------------------|------------------|-----------------------------------|----------------------------------------------------|----------------|
| <b>Derbyshire</b>           |                |                   |                                 |                  |                                   |                                                    |                |
| Barrow Hill New Whittington | 66.5           | 2.0               | 9.7                             | 1.5              | 2.8                               | 0.8                                                | 1.6            |
| Bolsover North West         | 69.7           | 2.6               | 12.4                            | 1.9              | 3.0                               | 0.8                                                | 1.6            |
| Clay Cross South            | 60.0           | 2.9               | 13.8                            | 2.1              | 2.6                               | 0.8                                                | 1.6            |
| Clowne South                | 69.3           | 5.0               | 23.9                            | 3.6              | 3.0                               | 1.2                                                | 2.4            |
| Hollingwood and Inkersall   | 55.5           | 1.9               | 9.0                             | 1.4              | 2.4                               | 0.6                                                | 1.3            |
| Killamarsh West             | 75.8           | 3.1               | 14.9                            | 2.3              | 3.2                               | 0.9                                                | 1.8            |
| Loundsley Green             | 33.5           | 4.0               | 19.4                            | 3.0              | 1.4                               | 0.3                                                | 0.7            |
| Lowgates and Woodthorpe     | 28.8           | 3.0               | 14.3                            | 2.2              | 1.2                               | 0.3                                                | 0.7            |
| Matlock St Giles            | 78.6           | 2.7               | 12.8                            | 2.0              | 3.3                               | 0.8                                                | 1.7            |
| Moor                        | 40.0           | 3.5               | 17.1                            | 2.6              | 1.7                               | 0.5                                                | 1.1            |
| North Wingfield Central     | 46.4           | 2.2               | 10.4                            | 1.6              | 2.0                               | 0.8                                                | 1.6            |
| Old Whittington             | 79.0           | 3.8               | 18.4                            | 2.8              | 3.4                               | 1.0                                                | 2.0            |
| Pinxton                     | 31.1           | 4.1               | 19.9                            | 3.0              | 1.3                               | 0.4                                                | 0.9            |
| Pleasley                    | 97.8           | 8.3               | 39.8                            | 6.1              | 4.2                               | 1.1                                                | 2.3            |
| Scarcliffe                  | 76.2           | 2.8               | 13.5                            | 2.1              | 3.2                               | 1.0                                                | 2.0            |
| Shirebrook Langwith         | 52.2           | 6.5               | 31.2                            | 4.8              | 2.2                               | 1.2                                                | 2.4            |
| South Normaton East         | 45.6           | 2.6               | 12.6                            | 1.9              | 1.9                               | 0.6                                                | 1.3            |
| <b>Sheffield</b>            |                |                   |                                 |                  |                                   |                                                    |                |
| Firth Park                  | 70.4           | 1.9               | 3.1                             | 0.9              | 3.0                               | 0.8                                                | 1.6            |
| Mosborough                  | 85.8           | 4.3               | 7.0                             | 2.1              | 3.7                               | 1.0                                                | 2.0            |
| Richmond                    | 59.8           | 3.7               | 6.0                             | 1.8              | 2.5                               | 0.8                                                | 1.7            |
| Southey                     | 66.7           | 2.4               | 3.9                             | 1.2              | 2.8                               | 0.7                                                | 1.5            |
| Woodhouse                   | 66.7           | 4.0               | 6.5                             | 2.0              | 2.8                               | 0.9                                                | 1.9            |
| <b>Rotherham</b>            |                |                   |                                 |                  |                                   |                                                    |                |
| Anston & Woodsetts          | 62.7           | 4.4               | 1.1                             | 1.0              | 2.7                               | 1.6                                                | 2.7            |
| Boston Castle               | 84.0           | 1.7               | 0.4                             | 0.4              | 3.6                               | 0.5                                                | 3.6            |
| Holderness                  | 64.7           | 2.5               | 0.7                             | 0.6              | 2.8                               | 0.9                                                | 2.8            |
| Hoover                      | 72.8           | 2.2               | 0.6                             | 0.5              | 3.1                               | 0.7                                                | 3.1            |
| Rother Vale                 | 80.3           | 2.5               | 0.6                             | 0.6              | 3.4                               | 0.7                                                | 3.4            |
| Rotherham East              | 62.1           | 1.4               | 0.4                             | 0.3              | 2.6                               | 0.5                                                | 2.6            |
| Silverwood                  | 52.1           | 2.2               | 0.6                             | 0.5              | 2.2                               | 1.0                                                | 2.2            |
| Sitwell                     | 95.8           | 3.1               | 0.8                             | 0.7              | 4.1                               | 0.8                                                | 4.1            |
| Wath                        | 60.0           | 2.3               | 0.6                             | 0.5              | 2.6                               | 0.9                                                | 2.6            |
| Wingfield                   | 42.9           | 3.0               | 0.8                             | 0.7              | 1.8                               | 1.6                                                | 1.8            |
| <b>Doncaster</b>            |                |                   |                                 |                  |                                   |                                                    |                |

| Wards              | Voucher   | Info packs | Initial local engagement | Induction  | Processing time for claims | Processing time for successful applications | Letters    |
|--------------------|-----------|------------|--------------------------|------------|----------------------------|---------------------------------------------|------------|
| Armthorpe          | 67.1      | 1.6        | 0.5                      | 0.6        | 2.9                        | 0.6                                         | 2.9        |
| Askern Spa         | 60.8      | 2.5        | 0.7                      | 1.0        | 2.6                        | 0.9                                         | 2.6        |
| Bentley            | 57.6      | 1.4        | 0.4                      | 0.5        | 2.5                        | 0.6                                         | 2.5        |
| Central            | 46.2      | 0.9        | 0.3                      | 0.4        | 2.0                        | 0.5                                         | 2.0        |
| Great North Road   | 51.6      | 1.6        | 0.5                      | 0.6        | 2.2                        | 0.7                                         | 2.2        |
| Mexborough         | 43.9      | 1.2        | 0.4                      | 0.5        | 1.9                        | 0.7                                         | 1.9        |
| Sprotbrough        | 89.1      | 2.9        | 0.9                      | 1.1        | 3.8                        | 0.8                                         | 3.8        |
| Thorne             | 56.7      | 2.2        | 0.7                      | 0.9        | 2.4                        | 0.9                                         | 2.4        |
| Town Moor          | 50.9      | 1.7        | 0.5                      | 0.7        | 2.2                        | 0.8                                         | 2.2        |
| <b>Bassetlaw</b>   |           |            |                          |            |                            |                                             |            |
| East Retford East  | 100.8     | 3.7        | 1.3                      | 2.0        | 4.3                        | 0.9                                         | 2.3        |
| East Retford South | 73.4      | 4.6        | 1.6                      | 2.6        | 3.1                        | 1.5                                         | 1.7        |
| Tuxford and Trent  | 106.0     | 6.6        | 2.3                      | 3.6        | 4.5                        | 1.5                                         | 2.9        |
| Worksop North      | 67.5      | 2.6        | 0.9                      | 1.4        | 2.9                        | 0.9                                         | 1.6        |
| Worksop North West | 59.6      | 2.5        | 0.9                      | 1.4        | 2.5                        | 1.0                                         | 1.5        |
| <b>Mean (SD)</b>   | 64.44(18) | 3(1.46)    | 7.34(9.17)               | 1.65(1.22) | 2.7(0.77)                  | 0.84(0.30)                                  | 2.10(0.76) |

**Supplementary 1c: Average cost per baby by intervention ward by activities**

|                             | <b>Advertisement</b> | <b>Preparation of booklets</b> | <b>Website development</b> | <b>Telephone, texts for processing claims</b> | <b>Procurement</b> | <b>Design of intervention</b> |
|-----------------------------|----------------------|--------------------------------|----------------------------|-----------------------------------------------|--------------------|-------------------------------|
| Each ward (ie no variation) | 3.4                  | 2.9                            | 0.6                        | 1.4                                           | 0.3                | 0.8                           |

**Supplementary 2: Regression model estimates for babies breastfed at 6-8 weeks**

| Independent variables                                      | Reduced model      |                 |
|------------------------------------------------------------|--------------------|-----------------|
|                                                            | Coef. <sup>a</sup> | SE <sup>b</sup> |
| <b>Trial arm</b>                                           |                    |                 |
| Reference category (control group)                         |                    |                 |
| Intervention <sup>c</sup>                                  | 0.290***           | 0.062           |
|                                                            |                    |                 |
| <b>Location of residence</b>                               |                    |                 |
| Reference category (Bassetlaw)                             |                    |                 |
| Doncaster                                                  | 0.101              | 0.137           |
| North Derbyshire                                           | -0.300**           | 0.113           |
| Rotherham                                                  | 0.489***           | 0.116           |
| Sheffield                                                  | 0.214              | 0.166           |
|                                                            |                    |                 |
| Baseline breastfeeding rate in ward                        | 0.029***           | 0.006           |
|                                                            |                    |                 |
| Inverse of the variance of breastfeeding rate <sup>d</sup> | 0.001***           | 0.000           |
|                                                            |                    |                 |
| No .of observations                                        | 92                 |                 |
| Constant                                                   | 1.727***           |                 |
| Pseudo R2                                                  | 0.191              |                 |

<sup>a</sup> The estimated parameters and asterisks show significance level of 1%(\*\*\*) , 5%(\*\*), 10%(\*)

<sup>b</sup> Standard error <sup>c</sup>The margins method was used to generate the incremental effects

<sup>d</sup> Included as covariate and not weights as a pragmatic option

**Supplementary 3: Regression model estimates for costs of the intervention**

| Independent variables                                      | Reduced model      |                 |
|------------------------------------------------------------|--------------------|-----------------|
|                                                            | Coef. <sup>a</sup> | SE <sup>b</sup> |
| <b>Trial arm</b>                                           |                    |                 |
| Reference category (control group)                         |                    |                 |
| Intervention <sup>c</sup>                                  | 18.364***          | 0.060           |
|                                                            |                    |                 |
| Deprivation (IMD) score for ward                           | 0.009*             | 0.005           |
|                                                            |                    |                 |
| Number of white people in ward                             | 0.000***           | 0.000           |
|                                                            |                    |                 |
| Baseline breastfeeding rate in ward <sup>d</sup>           | 0.003              | 0.006           |
|                                                            |                    |                 |
| Inverse of the variance of breastfeeding rate <sup>e</sup> | 0.000***           | 0.000           |
|                                                            |                    |                 |
| No .of observations                                        | 92                 |                 |
| Constant                                                   | -10.369***         |                 |

<sup>a</sup> The estimated parameters and asterisks show significance level of 1%(\*\*\*) , 5%(\*\*), 10%(\*)

<sup>b</sup> Standard error <sup>c</sup>The margins method was used to generate the incremental costs

<sup>d</sup> Model fitness was better with its inclusion <sup>e</sup>Included as covariate and not weights as a pragmatic option
